# Supplementary material for: Analysis of ether glycerophosphocholines at the level of CC locations from human plasma
Source: Royal Society of Chemistry journal article supplement (doi:10.1039/c9an01515a), 2019-11-01
Supplement: c9an01515a1.pdf [file c9an01515a1.pdf]

*Electronic Supporting information for*

## **Analysis of Ether Glycerophosphocholines at the Level of C=C Locations from Human Plasma**

Qiaohong Lin<sup>1</sup>, Donghui Zhang<sup>2</sup>, Yu Xia<sup>1,\*</sup>

<sup>1</sup>*MOE Key Laboratory of Bioorganic Phosphorus Chemistry & Chemical Biology, Department of Chemistry,*

*Tsinghua University, Beijing 100084, China; <sup>2</sup> Department of Precision Instrument, Tsinghua University, Beijing,*

*100084, China*

### **Table of Contents**

|                                                             |     |
|-------------------------------------------------------------|-----|
| 1. Protocols for lipid extraction from human plasma.....    | S-2 |
| 2. Supplemental methods for mass spectrometry analysis..... | S-2 |
| 3. Setup for offline PB reaction.....                       | S-3 |
| 4. Optimization of PB reaction conditions for PC-P.....     | S-4 |
| 5. Structural identification of PC-P via PB-MS/MS.....      | S-6 |
| 6. The PB reaction phenomena of PC-O.....                   | S-7 |
| 7. Analysis of ether PCs from human plasma.....             | S-9 |

To whom correspondence should be addressed:

Prof. Yu Xia, [xiayu@mail.tsinghua.edu.cn](mailto:xiayu@mail.tsinghua.edu.cn)

## **1. Protocols for lipid extraction from human plasma**

Briefly, 50  $\mu$ L human plasma was diluted with 950  $\mu$ L water, 1 mL methanol and 2 mL chloroform containing 0.015% BHT in a 10 mL centrifuge tube. The mixture was vortex-mixed for 10 min and then was centrifuged at 10,000 rpm for 20 min to obtain layer separation. The bottom chloroform layer was collected and the extraction procedure was repeated twice by adding 2 mL chloroform for every time. Finally, the chloroform layers were combined and evaporated under a stream of nitrogen. The extract was re-dissolved in 1 mL methanol and stored at -20 °C prior to MS analysis.

## **2. Supplemental methods for mass spectrometry analysis**

**NanoESI.** Positive-ion nanoESI experiments were performed on a QTRAP 4500 mass spectrometer (Sciex, Toronto, CA) equipped with a home-built nanoESI source. NanoESI capillary was made from borosilicate glass capillary (1.5 mm o.d., 0.86 mm i.d.) by a P-1000 Flaming/Brown micropipette puller (Sutter Instrument, Novato, CA, USA). A stainless-steel wire was inserted into the nanoESI capillary to provide electric contact to the solution for nanoESI. Data collection modes include enhanced MS (EMS) and enhanced product ion (EPI). The instrument parameters were as follows: nanoESI voltage, 1500 V; curtain gas, 10 psi; declustering potential, 100V.

**LC-MS.** LC-MS experiments were performed on a QTRAP 4500 mass spectrometer coupled with an ExionLC AC system (Sciex, Toronto, CA) or a X500R QTOF mass spectrometer (Sciex, Toronto, CA) coupled with a 20AD HPLC system (Shimadzu, Tokyo, Japan). LC separation was performed on a hydrophilic interaction chromatography (HILIC) column (150 mm  $\times$  2.1 mm, 2.7  $\mu$ m; Sigma-Aldrich, St. Louis, MO, USA) using the following parameters: flow rate 0.2 mL/min, oven temperature 30 °C, mobile phase gradient: 90-85 % B in 0-5 min, 85 % B in 5-8 min, 85-80% B in 8-15 min, 80% B in 15-18 min, 80-70% B in 18-19 min, 70% B in 19-22 min, 70%-90% B in 22-23 min and 90% B in 23-25 min, where A was 10 mM aqueous ammonium acetate and B was acetonitrile. Injection volume was 2  $\mu$ L for QTRAP and 2-10  $\mu$ L for QTOF. The parameters

on QTRAP 4500 were as follows: ESI voltage,  $\pm 4500$  V; curtain gas, 35 psi; interface heater temperature,  $400^{\circ}\text{C}$ ; nebulizing gas 1 and gas 2, 30 psi; declustering potential,  $\pm 100\text{V}$ . The parameters on X500R QTOF were as follows: ESI voltage, 5500 V; curtain gas, 25 psi; CAD gas, 8; interface heater temperature,  $500^{\circ}\text{C}$ ; nebulizing gas 1 and gas 2, 55 psi; declustering potential, 80V.

### 3. Setup for offline PB reaction

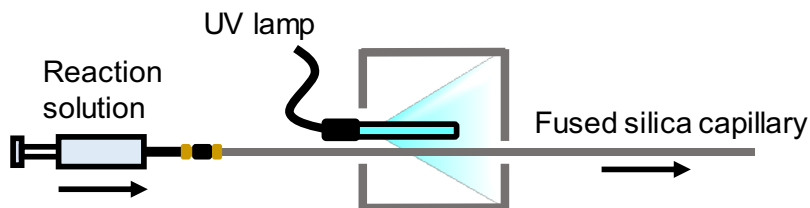

**Scheme S1** A schematic representation of flow microreactor for implementing offline PB reaction. The UV lamp was parallelly positioned 1 cm away from the fused silica capillary. The PB reaction time was calculated by the total volume of the fused silica capillary exposed to UV irradiation divided by the solution flow rate.

#### 4. Optimization of the PB reaction conditions for PC-P

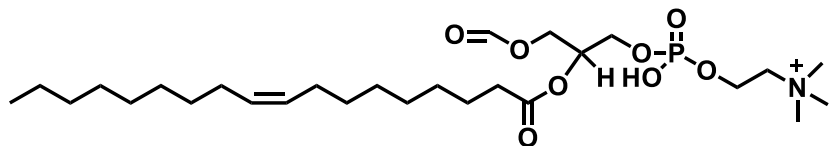

Oxidation products,  $m/z$  550.4

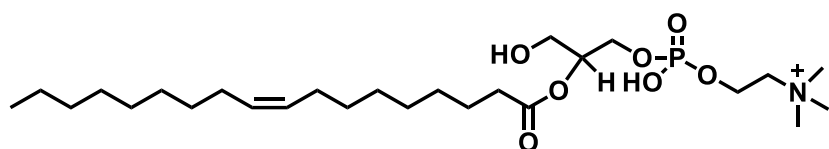

Hydrolysis products,  $m/z$  522.5

**Scheme S2** The structures of oxidation products and hydrolysis products.

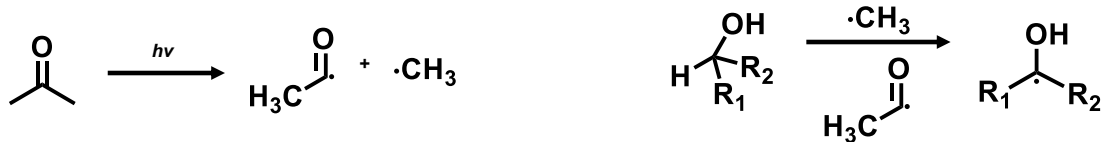

MeOH:  $R_1 = R_2 = H$ ; EtOH:  $R_1 = CH_3, R_2 = H$ ; IPA:  $R_1 = R_2 = CH_3$ ; IBA:  $R_1 = CH(CH_3)_2, R_2 = H$

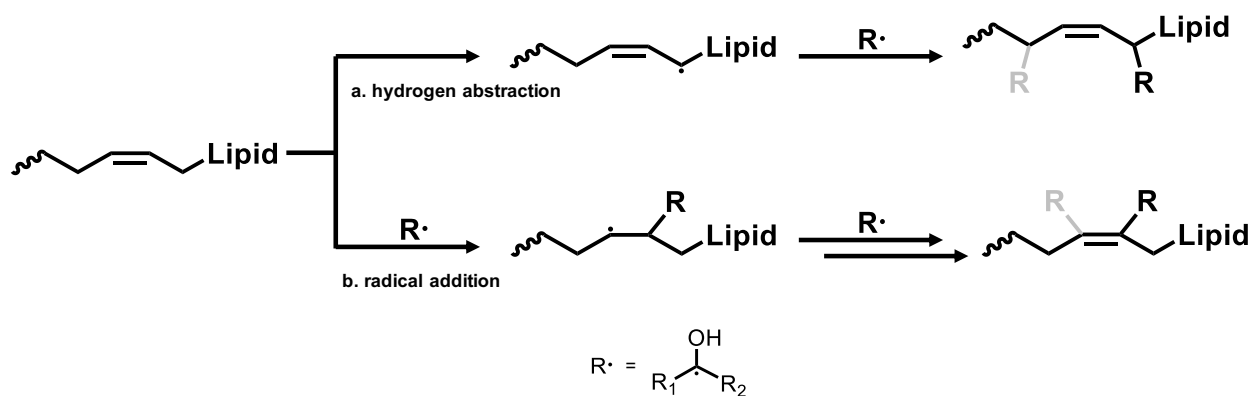

**Scheme S3** Possible mechanism for the formation of alcohol substitution side products.

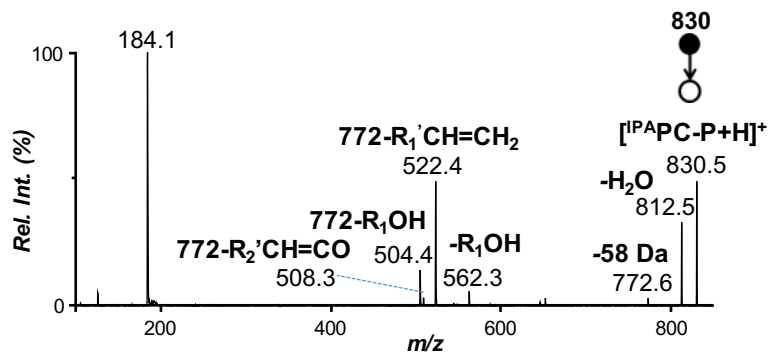

**Fig. S1** Positive-ion NanoESI MS<sup>2</sup> CID of IPA substitution products at *m/z* 830.5.

## 5. Structural identification of PC-P via PB-MS/MS

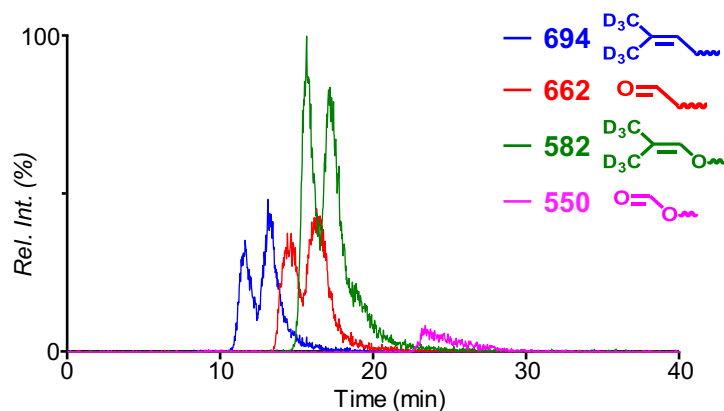

**Fig. S2** Extracted ion chromatograms of  $m/z$  694, 662, 582, and 550 on positive-ion RPLC-ESI-MS/MS of PB products of PC P-18:0/18:1(9Z) at  $m/z$  836.5. RPLC conditions: flow rate 0.4 mL/min, oven temperature 30 °C, isocratic gradient of 80% B over 40 min. Mobile phase A, 10 mM aqueous ammonium acetate; mobile phase B, acetone/acetonitrile/IPA, 50/25/25.

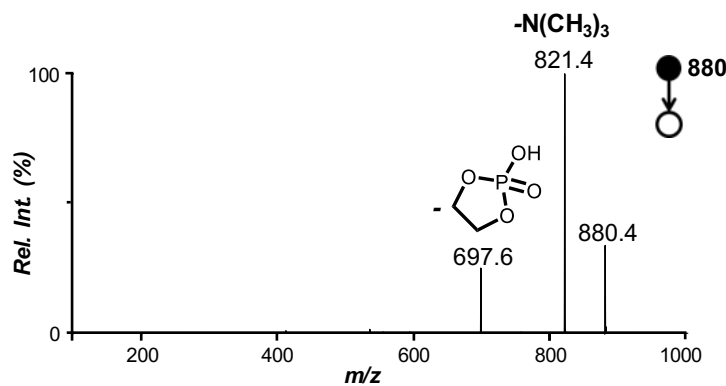

**Fig. S3** Positive-ion nanoESI ion trap MS<sup>2</sup> CID of sodium adduct of the PB products of PC P-18:0/20:4(5Z, 8Z, 11Z, 14Z) at  $m/z$  880.5. PB reaction solvent: d<sub>6</sub>-acetone/water (20 mM NH<sub>4</sub>OAc)/IPA (50/40/10, v/v/v).

## 6. PB reaction phenomena of PC-O

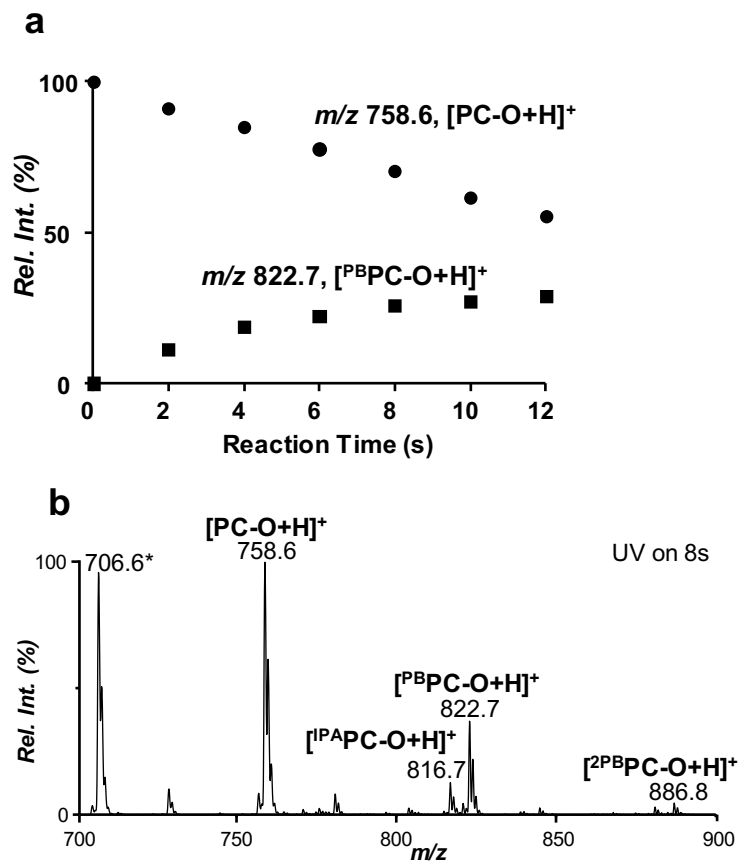

**Fig. S4** (a) Kinetic curves of PB reaction of PC O-18:1(9Z)/O-18:1(9Z). (b) Positive-ion nanoESI MS<sup>1</sup> spectra of 2µM PC O-18:1(9Z)/O-18:1(9Z) in d<sub>6</sub>-acetone/water/IPA/formic acid (68.6/29.4/1/1, v/v/v/v) after 8 s UV exposure. “\*” denotes internal standard (IS) PC 15:0/15:0.

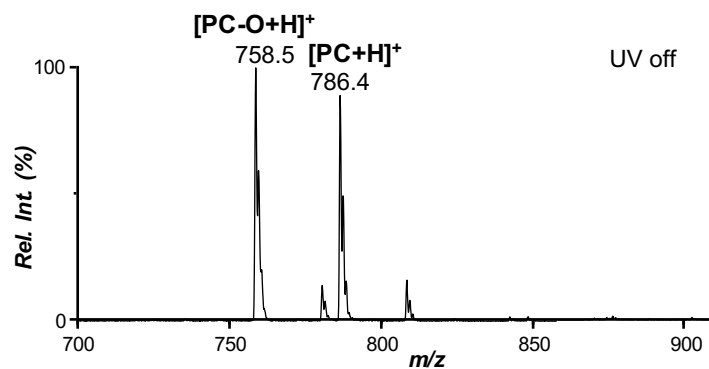

**Fig. S5** Positive-ion nanoESI MS<sup>1</sup> spectra of an equimolar mixture (2 $\mu$ M each) of PC O-18:1(9Z)/O-18:1(9Z) and PC 18:1(9Z)/18:1(9Z) in acetone/water/IPA/formic acid (68.6/29.4/1/1, v/v/v/v) before UV exposure.



## 7. Analysis of ether PCs from human plasma

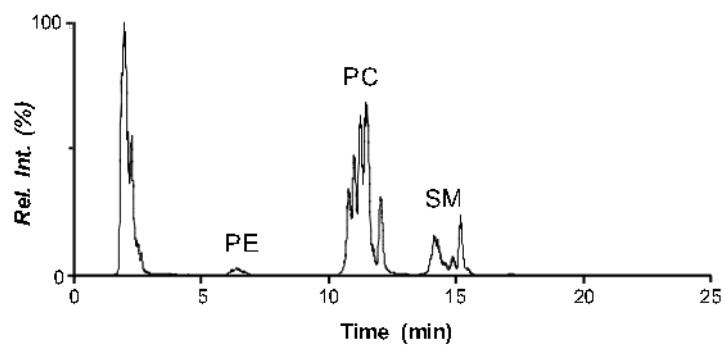

**Fig. S6** Positive-ion HILIC-ESI-QTOF-MS chromatogram of total lipid extract from human plasma.

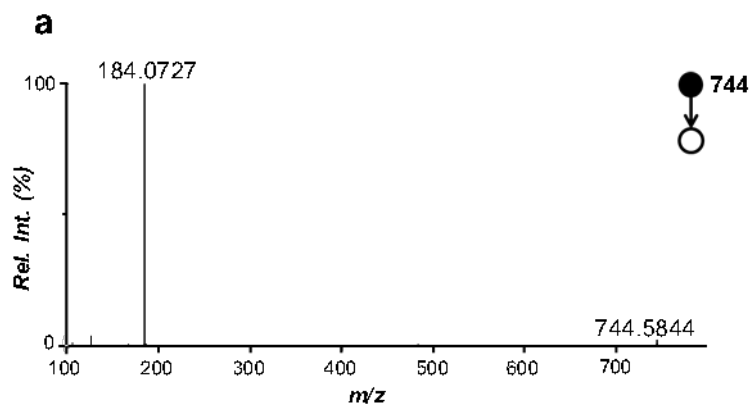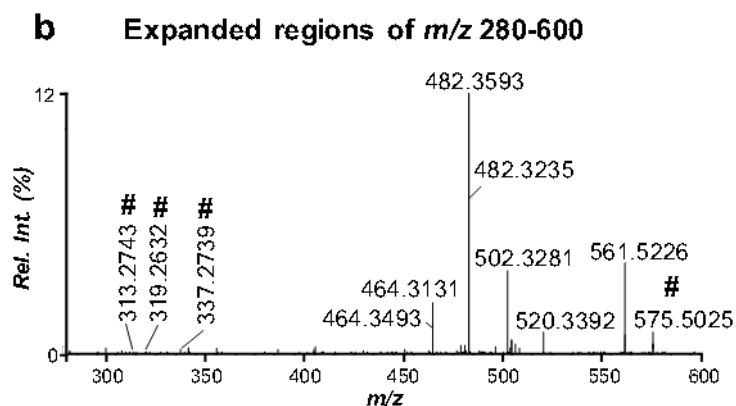

- # 575.5025: loss of head group (169 Da) from DMPE 16:0\_18:2
- # 319.2632: loss of 16:0 fatty acid from 575
- # 337.2739: loss of 16:0 ketene from 575
- # 313.2743: loss of 18:2 ketene from 575
- 464.3131: loss of 18:2 fatty acid from PC 15:0\_18:2 or DMPE 16:0\_18:2
- 464.3493: loss of 18:2 fatty acid from PC O-16:0/18:2
- 482.3235: loss of 18:2 ketene from PC 15:0\_18:2 or DMPE 16:0\_18:2
- 482.3593: loss of 18:2 ketene from PC O-16:0/18:2
- 502.3281: loss of 15:0 fatty acid from PC 15:0\_18:2
- 520.3392: loss of 15:0 ketene from PC 15:0\_18:2

**Fig. S7** (a) Positive-ion HILIC-ESI-QTOF-MS/MS of *m/z* 744.5. (b) Expanded regions of *m/z* 280-600 from (a) and the identities of fragment ions.

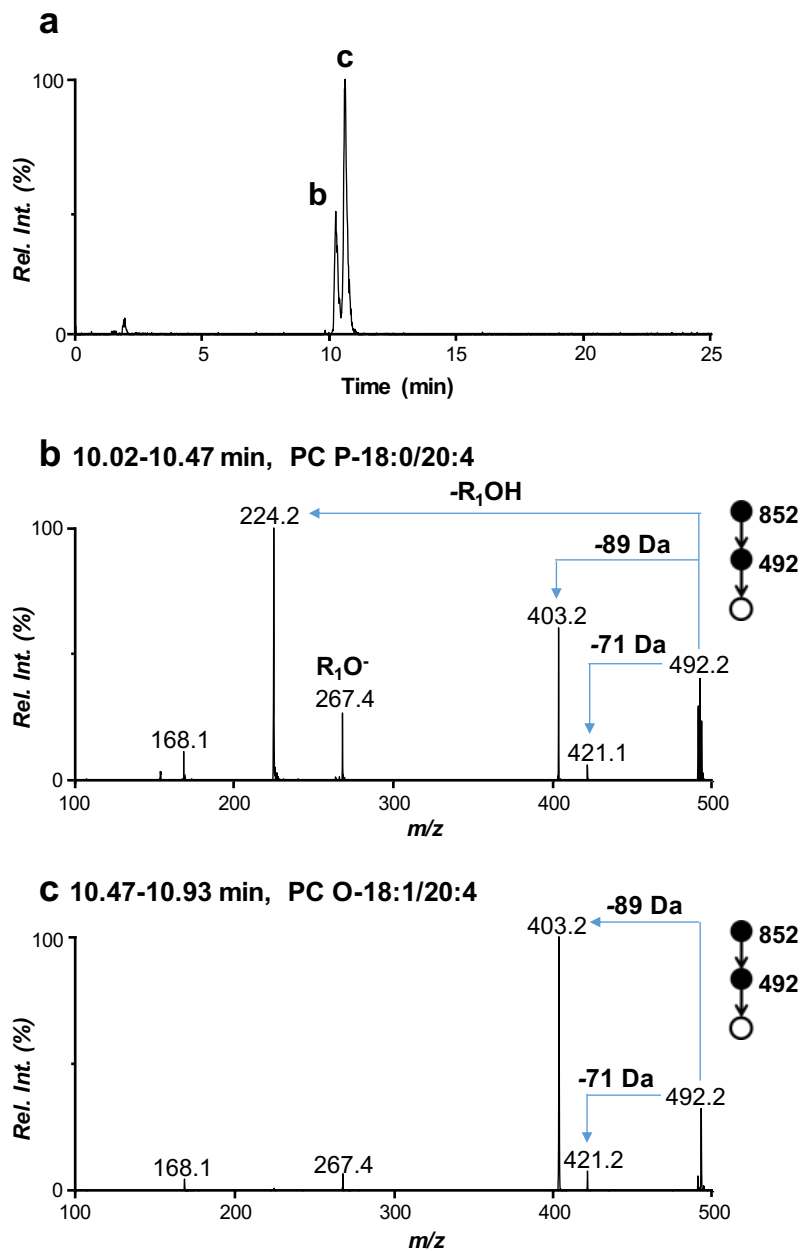

**Fig. S8** (a) Negative-ion HILIC-ESI-QTRAP-MS<sup>3</sup> chromatogram of [M-15-20:4 ketene]<sup>-</sup> ion at  $m/z$  492.2 produced from MS<sup>2</sup> of [M+OAc]<sup>-</sup> ( $m/z$  852.6). Averaged mass spectra from (b) 10.02-10.47 and (c) 10.47-10.93 min.

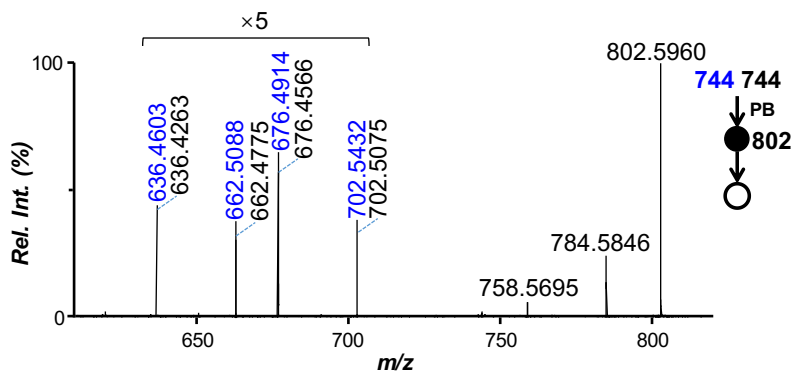

Fig. S9 Positive-ion HILIC-ESI-QTOF-MS/MS of PB products at  $m/z$  802.6.

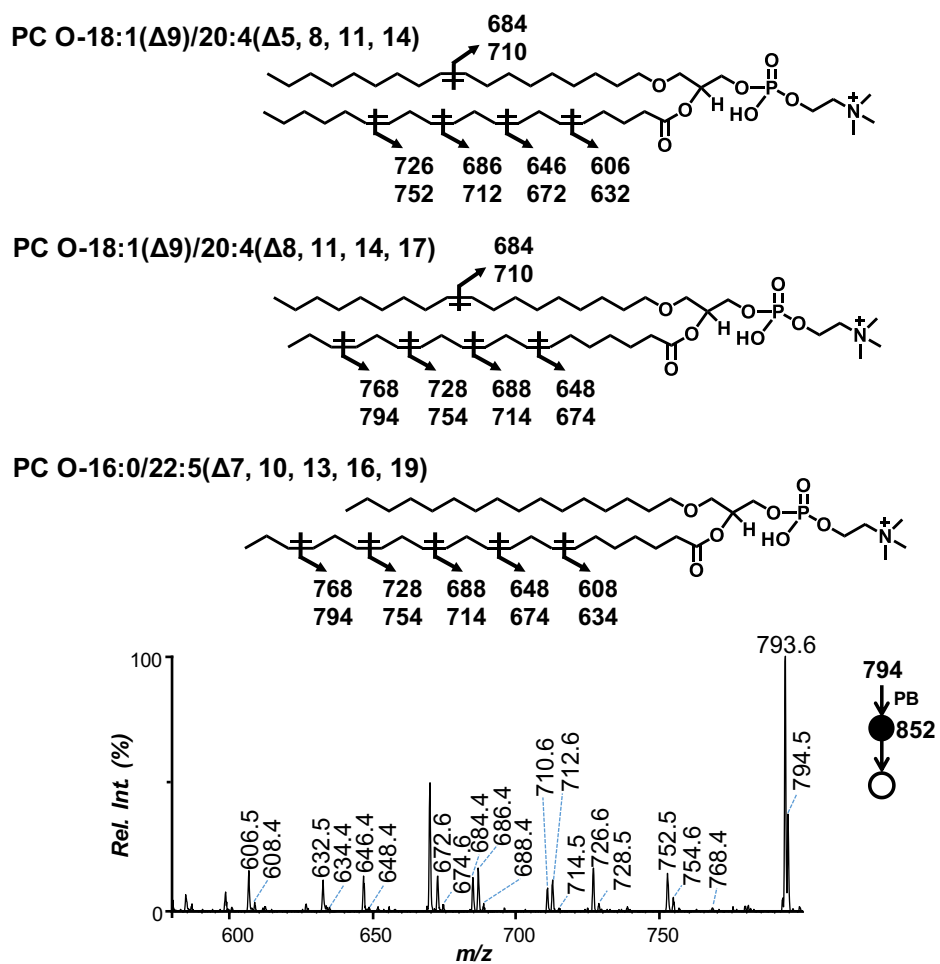

Fig. S10 Positive-ion HILIC-ESI-QTRAP-MS/MS of PB products at  $m/z$  852.6.

**Table S1** High resolution mass measurements of  $[M+H]^+$  ions of ether PCs from human plasma and their assignments based on negative-ion MS<sup>3</sup> CID.

| Experimental <i>m/z</i> | Theoretical <i>m/z</i> | Lipid            | Relative Abundance, % | Structures                                         |
|-------------------------|------------------------|------------------|-----------------------|----------------------------------------------------|
| 716.5612                | 716.5589               | PC O-32:2/P-32:1 | 0.04                  | PC P-16:0/16:1                                     |
| 718.5408                | 718.5381               | PC 31:1          | 0.06                  | PC 15:0_16:1                                       |
| 718.5759                | 718.5745               | PC O-32:1/P-32:0 | 0.31                  | PC P-16:0/16:0<br>PC O-16:0/16:1                   |
| 720.5554                | 720.5538               | PC 31:0          | 0.16                  | PC 15:0_16:0                                       |
| 720.5905                | 720.5902               | PC O-32:0        | 0.49                  | PC O-16:0/16:0                                     |
| 742.5758                | 742.5745               | PC O-34:3/P-34:2 | 1.28                  | PC P-16:0/18:2                                     |
| 744.5571                | 744.5538               | PC 33:2          | 0.78                  | PC 15:0_18:2                                       |
| 744.5899                | 744.5902               | PC O-34:2/P-34:1 | 1.58                  | PC P-16:0/18:1<br>PC O-16:0/18:2                   |
| 746.5710                | 746.5694               | PC 33:1          | 0.54                  | PC 16:0_17:1<br>PC 15:0_18:1                       |
| 746.6044                | 746.6058               | PC O-34:1/P-34:0 | 0.92                  | PC O-18:1/16:0<br>PC O-16:0/18:1                   |
| 764.5607                | 764.5589               | PC O-36:6/P-36:5 | 0.13                  | PC P-16:0/20:5                                     |
| 766.5765                | 766.5745               | PC O-36:5/P-36:4 | 2.17                  | PC P-16:0/20:4                                     |
| 768.5905                | 768.5902               | PC O-36:4/P-36:3 | 2.94                  | PC P-18:1/18:2<br>PC P-16:0/20:3<br>PC O-16:0/20:4 |
| 770.5701                | 770.5694               | PC 35:3          | 0.30                  | PC 17:1_18:2<br>PC 15:0_20:3                       |
| 770.6038                | 770.6058               | PC O-36:3/P-36:2 | 1.08                  | PC P-18:0/18:2<br>PC O-18:1/18:2<br>PC O-16:0/20:3 |
| 772.5873                | 772.5851               | PC 35:2          | 1.40                  | PC 17:1_18:1<br>PC 17:0_18:2                       |
| 772.6191                | 772.6215               | PC O-36:2/P-36:1 | 0.50                  | PC O-18:1/18:1<br>PC P-18:0/18:1<br>PC O-18:0/18:2 |
| 790.5766                | 790.5745               | PC O-38:7/P-38:6 | 0.30                  | PC P-16:0/22:6                                     |

|          |          |                  |      |                                                                                        |
|----------|----------|------------------|------|----------------------------------------------------------------------------------------|
| 792.5916 | 792.5902 | PC O-38:6/P-38:5 | 0.88 | PC P-18:1/20:4<br>PC O-18:2/20:4<br>PC O-18:1/20:5<br>PC P-16:0/22:5<br>PC O-16:0/22:6 |
| 794.6069 | 794.6058 | PC O-38:5/P-38:4 | 2.80 | PC P-18:0/20:4<br>PC O-18:1/20:4<br>PC P-16:0/22:4<br>PC O-16:0/22:5                   |
| 796.5881 | 796.5851 | PC 37:4          | 0.72 | PC 17:1_20:3<br>PC 17:0_20:4                                                           |
| 796.6191 | 796.6215 | PC O-38:4/P-38:3 | 1.69 | PC P-18:0/20:3<br>PC O-18:1/20:3<br>PC O-18:0/20:4<br>PC O-16:0/22:4                   |
| 816.5904 | 816.5902 | PC O-40:8/P-40:7 | 0.26 | PC P-18:1/22:6                                                                         |
| 818.6072 | 818.6058 | PC O-40:7/P-40:6 | 0.32 | PC O-18:1/22:6                                                                         |
| 820.5880 | 820.5851 | PC 39:6          | 0.16 | PC 17:0_22:6                                                                           |
| 820.6219 | 820.6215 | PC O-40:6/P-40:5 | 0.36 | PC O-20:2/20:4<br>PC O-18:1/22:5<br>PC O-18:0/22:6                                     |
| 822.6048 | 822.6008 | PC 39:5          | 0.16 | PC 19:1_20:4<br>PC 17:0_22:5                                                           |
| 822.6373 | 822.6371 | PC O-40:5/P-40:4 | 0.38 | PC O-20:1/20:4<br>PC O-18:1/22:4<br>PC O-18:0/22:5                                     |
| 824.6186 | 824.6164 | PC 39:4          | 0.16 | 17:0_22:4<br>19:0_20:4                                                                 |
| 824.6517 | 824.6528 | PC O-40:4/P-40:3 | 0.26 | PC O-20:0/20:4<br>PC O-18:0/22:4                                                       |
| 850.6693 | 850.6684 | PC O-42:5/P-42:4 | 0.20 | PC O-22:1/20:4                                                                         |

**Table S2** Identified unsaturated ether PCs from human plasma based on PB-MS/MS (Some unconfident peaks are labelled in parentheses due to their poor signal-to-noise ratios or  $m/z$  errors over 5 ppm).

| $[M+H]^+$<br>$m/z$ | $[^{PB}M+H]^+$<br>$m/z$ | Diagnostic Ions                                            | Molecular Lipid with Defined C=C<br>Location |
|--------------------|-------------------------|------------------------------------------------------------|----------------------------------------------|
| 718.5759           | 776.6                   | 550.3860                                                   | PC P-16:0/16:0                               |
|                    |                         | 636.4597, (662)                                            | PC O-16:0/16:1( $\Delta$ 9)                  |
| 742.5758           | 800.6                   | 574; 634, 660; 674, 700                                    | PC P-16:0/18:2( $\Delta$ 9, 12)              |
| 744.5899           | 802.6                   | 576.3999; 634.4454, (660)                                  | PC P-16:0/18:1( $\Delta$ 9)                  |
|                    |                         | 636.4603, 662.5088; 676.4914, 702.5432                     | PC O-16:0/18:2( $\Delta$ 9,12)               |
| 746.6044           | 804.6                   | 636.4594, 662.5112                                         | PC O-18:1( $\Delta$ 9)/16:0                  |
|                    |                         | (664), 690.5432                                            | PC O-16:0/18:1( $\Delta$ 11)                 |
|                    |                         | 636.4594, 662.5112                                         | PC O-16:0/18:1( $\Delta$ 9)                  |
|                    |                         | (664), 690.5432                                            | PC O-18:1( $\Delta$ 11)/16:0                 |
| 766.5764           | 824.6                   | 598; 578, 604; 618, 644; 658, 684; 698, 724                | PC P-16:0/20:4( $\Delta$ 5, 8, 11, 14)       |
| 768.5909           | 826.6                   | 574; 658, 684; 660, 686; 700, 726                          | PC P-18:1( $\Delta$ 9)/18:2( $\Delta$ 9, 12) |
|                    |                         | 600; 620, 646; 660, 686; 700, 726                          | PC P-16:0/20:3( $\Delta$ 8, 11, 14)          |
|                    |                         | 580, 606; 620, 646; 660, 686; 700, 726                     | PC O-16:0/20:4( $\Delta$ 5, 8, 11, 14)       |
| 770.6038           | 828.6                   | 574.3846; 662.4759, 688.5246; 702.5078, (728)              | PC P-18:0/18:2( $\Delta$ 9, 12)              |
|                    |                         | 660.4608, 686.5152; 662.4756, 688.5280; 702.5078, 728.5559 | PC O-18:1( $\Delta$ 9)/18:2( $\Delta$ 9, 12) |

|          |       |                                                                                              |                                                      |
|----------|-------|----------------------------------------------------------------------------------------------|------------------------------------------------------|
|          |       | 622.4424, 648.4943; 662.4756, 688.5280; 702.5078, 728.5559                                   | PC O-16:0/20:3( $\Delta$ 8, 11, 14)                  |
| 772.6191 | 830.6 | 576.4013; 662.4760, 688.5257                                                                 | PC P-18:0/18:1( $\Delta$ 9)                          |
|          |       | 664.4924, 690.5405; 704.5195, 730.5777                                                       | PC O-18:0/18:2( $\Delta$ 9, 12)                      |
|          |       | 662.4768, 688.5303                                                                           | PC O-18:1( $\Delta$ 9)/18:1( $\Delta$ 9)             |
| 794.6069 | 852.6 | 598; 606, 632; 646, 672; 686, 712; 726, 752                                                  | PC P-18:0/20:4( $\Delta$ 5, 8, 11, 14)               |
|          |       | 626; 606, 632; 646, 672; 686, 712; 726, 752                                                  | PC P-16:0/22:4( $\Delta$ 7, 10, 13, 16)              |
|          |       | 684, 710; 606, 632; 646, 672; 686, 712; 726, 752                                             | PC O-18:1( $\Delta$ 9)/20:4( $\Delta$ 5, 8, 11, 14)  |
|          |       | 684, 710; 648, 674; 688, 714; 728, 754; 768, 794                                             | PC O-18:1( $\Delta$ 9)/20:4( $\Delta$ 8, 11, 14, 17) |
|          |       | 608, 634; 648, 674; 688, 714; 728, 754; 768, 794                                             | PC O-16:0/22:5( $\Delta$ 7, 10, 13, 16, 19)          |
| 796.6191 | 854.6 | 686.4762, 712.5286; 648.4604, 674.5132; 688.4919,<br>714.5434; 728.5215, 754.5731            | PC O-18:1( $\Delta$ 9)/20:3( $\Delta$ 8, 11, 14)     |
|          |       | 608.4282, 634.4818; 648.4604, 674.5132; 688.4919,<br>714.5434; 728.5215, 754.5731            | PC O-18:0/20:4( $\Delta$ 5, 8, 11, 14)               |
|          |       | 608.4282, 634.4818; 648.4604, 674.5132; 688.4919,<br>714.5434; 728.5215, 754.5731            | PC O-16:0/22:4( $\Delta$ 7, 10, 13, 16)              |
| 822.6373 | 880.6 | 684.4612, (710); 634.4443, 660.4972; 674.4739, 700.5265;<br>714.5067, 740.5552; (754), (780) | PC O-20:1( $\Delta$ 9)/20:4( $\Delta$ 5, 8, 11, 14)  |
